# Supplementary material for: E7 Oncogene HPV58 Variants Detected in Northeast Brazil: Genetic and Functional Analysis
Source: MDPI journal article supplement (doi:10.3390/microorganisms11081915), 2023-07-27
Supplement: s1 [file s1]

**Supplementary Table S1.** Selective pressure estimates in the genomic region that include E7 gene of HPV58 based on log-likelihood, calculated by PAML program. The model that best fits the data are in bold. \* means that values were determined from arithmetic mean.

| ORF       | Model     | lnL                 | $\omega = \text{dN/dS}^*$ | Parameters                                                                                                                                                                                    |
|-----------|-----------|---------------------|---------------------------|-----------------------------------------------------------------------------------------------------------------------------------------------------------------------------------------------|
| <b>E7</b> | M0        | -1442.267982        | 0.88348                   | $\omega = 0.88348$                                                                                                                                                                            |
|           | M1        | -1433.929983        | 0.35105                   | $p_0 = 0.64895$ ( $p_1 = 0.35105$ ) $\omega_0 = 0.00000$ ; $\omega_1 = 1.00000$                                                                                                               |
|           | M2        | -1417.952949        | 0.87940                   | $p_0 = 0.95986$ ; $p_1 = 0.00000$ ( $p_2 = 0.04014$ ) $\omega_0 = 0.31914$ ; $\omega_1 = 1.00000$ ; $\omega_2 = 14.27708$                                                                     |
|           | <b>M3</b> | <b>-1417.952637</b> | <b>0.87940</b>            | <b><math>p_0 = 0.87683</math>; <math>p_1 = 0.08303</math> (<math>p_2 = 0.04014</math>) <math>\omega_0 = 0.31913</math>; <math>\omega_1 = 0.31917</math>; <math>\omega_2 = 14.27709</math></b> |
|           | M7        | -1434.108126        | 0.30000                   | $p = 0.00500$ ; $q = 0.01158$                                                                                                                                                                 |
|           | M8        | -1417.953795        | 0.87960                   | $p_0 = 0.95989$ ( $p_1 = 0.04011$ ) $p = 46.49437$ ; $q = 99.00000$ ; $\omega_s = 14.28357$                                                                                                   |
